# Supplementary material for: Thriving in the Cold: Glacial Expansion and Post-Glacial Contraction of a Temperate Terrestrial Salamander (Plethodon serratus)
Source: PLoS One. 2015 Jul 1;10(7):e0130131. doi: 10.1371/journal.pone.0130131 (PMC4488858; doi:10.1371/journal.pone.0130131)
Supplement: S4 Table — (XLSX) [file pone.0130131.s008.xlsx]

## Sheet: Sheet1
S4 Table. Descriptive statistics and tests of neutrality for the nuclear loci.
	Descriptive statistics							Tests of neutrality
	Length	#VS	Hd	π	θπ	θS		Tajima's D	P-value	Fu's FS	P-value
BDNF	667	9
Ozark			0	0	0	0		0	1	-	-
Sicily Island			0	0	0	0		0	1	-	-
Kisatchie			0	0	0	0		0	1	-	-
Appalachian			0.1429	0.000214	0.142857	0.314452		-1.15524	0.136	-0.59478	0.107
OuachitaG			0.359	0.001494	0.998026	0.778764		0.56228	0.752	1.42563	0.76
OuachitaB			0.2599	0.000659	0.440242	1.09663		-1.28558	0.081	-2.7523	0.097
OuachitaR			0.6058	0.002267	1.51462	0.717998		2.06365	0.964	2.32469	0.852
c3	262	30
Ozark			0.5394	0.015513	4.06452	1.70348		3.63587	1	8.35672	0.983
Sicily Island			0	0	0	0		0	1	-	-
Kisatchie			0.5303	0.002024	0.530303	0.331139		1.3811	0.966	1.15205	0.643
Appalachian			0.6275	0.002794	0.732026	0.581471		0.63188	0.794	0.44677	0.554
OuachitaG			0.7461	0.014713	3.85468	2.36618		-0.13384	0.53	-0.97616	0.398
OuachitaB			0.4405	0.014907	3.90572	2.22492		-0.59631	0.355	2.70385	0.845
OuachitaR			0.7603	0.019287	5.05324	2.89356		-1.05666	0.149	1.42823	0.725
NCX1	496	9
Ozark			0	0	0	0		0	1	-	-
Sicily Island			0	0	0	0		0	1	-	-
Kisatchie			0	0	0	0		0	1	-	-
Appalachian			0.1895	0.000381	0.189474	0.28187		-0.59155	0.241	-0.0966	0.22
OuachitaG			0.1493	0.000341	0.169482	0.384817		-0.85706	0.213	-2.96505	0.018
OuachitaB			0.4538	0.000932	0.463248	0.365543		0.38966	0.753	0.73525	0.605
OuachitaR			0.6167	0.001501	0.614262	0.895333		-0.33336	0.423	-0.9546	0.32
POMC	465	18
Ozark			0.0323	6.9e-05	0.032258	0.212935		-1.08044	0.119	-1.81647	0.025
Sicily Island			0	0	0	0		0	1	-	-
Kisatchie			0.4848	0.002085	0.969697	0.662279		1.3564	0.915	2.32787	0.86
Appalachian			0	0	0	0		0	1	-	-
OuachitaG			0.151	0.000336	0.156086	1.15445		-1.93702	0.002	-9.34862	< 0.001
OuachitaB			0.0301	6.5e-05	0.030072	0.183277		-0.90855	0.17	-1.72908	0.037
OuachitaR			0.09	0.000197	0.091582	0.893208		-1.78963	0.002	-9.0426	< 0.001
Rag-1	663	15
Ozark			0	0	0	0		0	1	-	-
Sicily Island			0.131	0.000201	0.133333	0.50484		-1.50738	0.045	-2.35488	0.005
Kisatchie			0	0	0	0		0	1	-	-
Appalachian			0	0	0	0		0	1	-	-
OuachitaG			0.4801	0.000717	0.475489	0.969542		-1.08869	0.133	-2.7571	0.057
OuachitaB			0.1586	0.000246	0.163197	1.09966		-1.83316	0.002	-8.77756	< 0.001
OuachitaR
SLC8A3	717	22
Ozark			0	0	0	0		0	1	-	-
Sicily Island			0	0	0	0		0	1	-	-
Kisatchie			0	0	0	0		0	1	-	-
Appalachian			0.7895	0.002547	1.83158	1.97309		-0.23581	0.456	0.44794	0.612
OuachitaG			0.4164	0.001747	1.25633	2.15959		-1.10435	0.135	-6.15087	0.01
OuachitaB			0.5475	0.000934	0.671293	1.09966		-0.83854	0.209	-1.38269	0.245
OuachitaR			0.1429	0.000205	0.147178	1.077		-1.82766	0.004	-9.18215	< 0.001
Notes:
#VS: variable sites, HD: haplotype diversity, π: nucleotide diversity.
Bolded values denote significance.
